# Supplementary material for: Phage-Plasmids Spread Antibiotic Resistance Genes through Infection and Lysogenic Conversion
Source: PubMed Central journal article supplement (PMC9600943; doi:10.1128/mbio.01851-22), 2022-09-26

A.

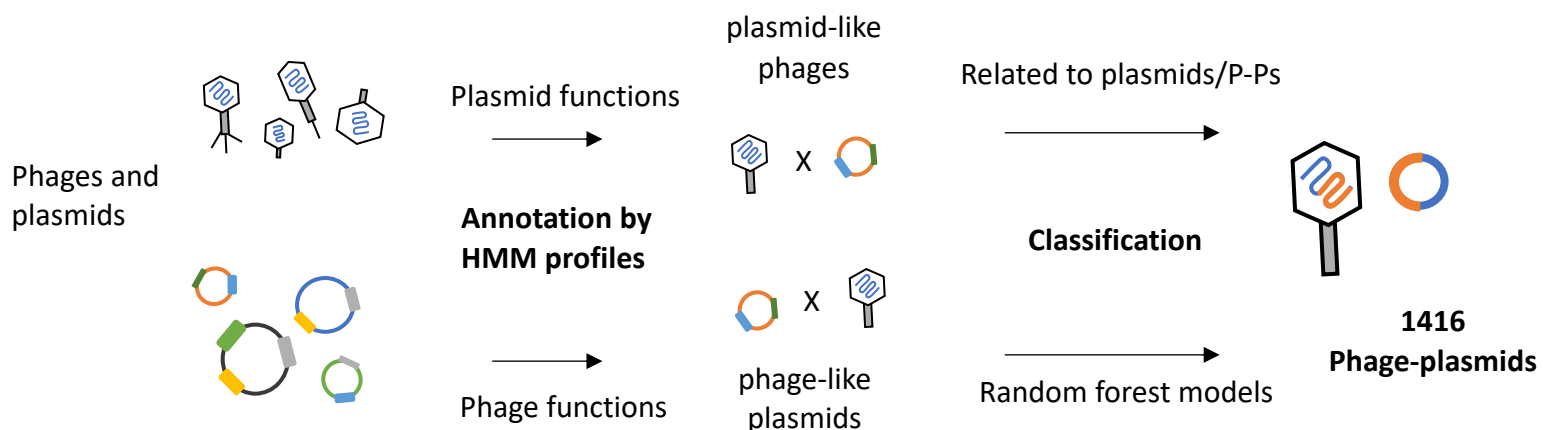

B.

| Database version | AB-group | SSU5-supergroup<br>(pCAV, pKpn, pMT1, pSLy3, SSU5_pHMC2) | P1-group | N15-group |
|------------------|----------|----------------------------------------------------------|----------|-----------|
| Mai 2019         | 24       | 145 (8+38+35+29+35)                                      | 64       | 42        |
| March 2021       | 40       | 268 (14+94+43+62+55)                                     | 149      | 71        |

C.

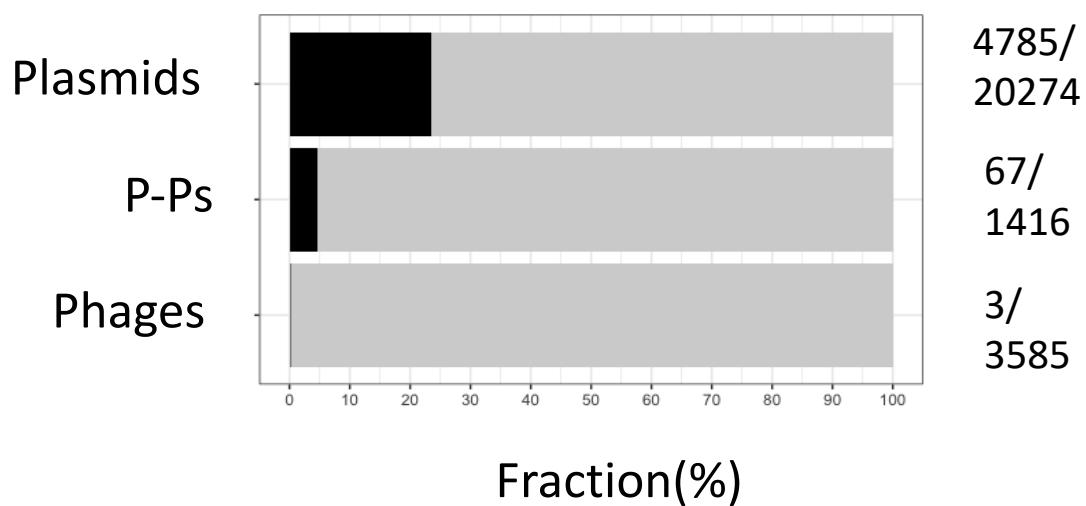

Supplement: mbio.01851-22-s0006.pdf [file mbio.01851-22-s0006.pdf]
