# Supplementary material for: Phage-Plasmids Spread Antibiotic Resistance Genes through Infection and Lysogenic Conversion
Source: PubMed Central journal article supplement (PMC9600943; doi:10.1128/mbio.01851-22), 2022-09-26

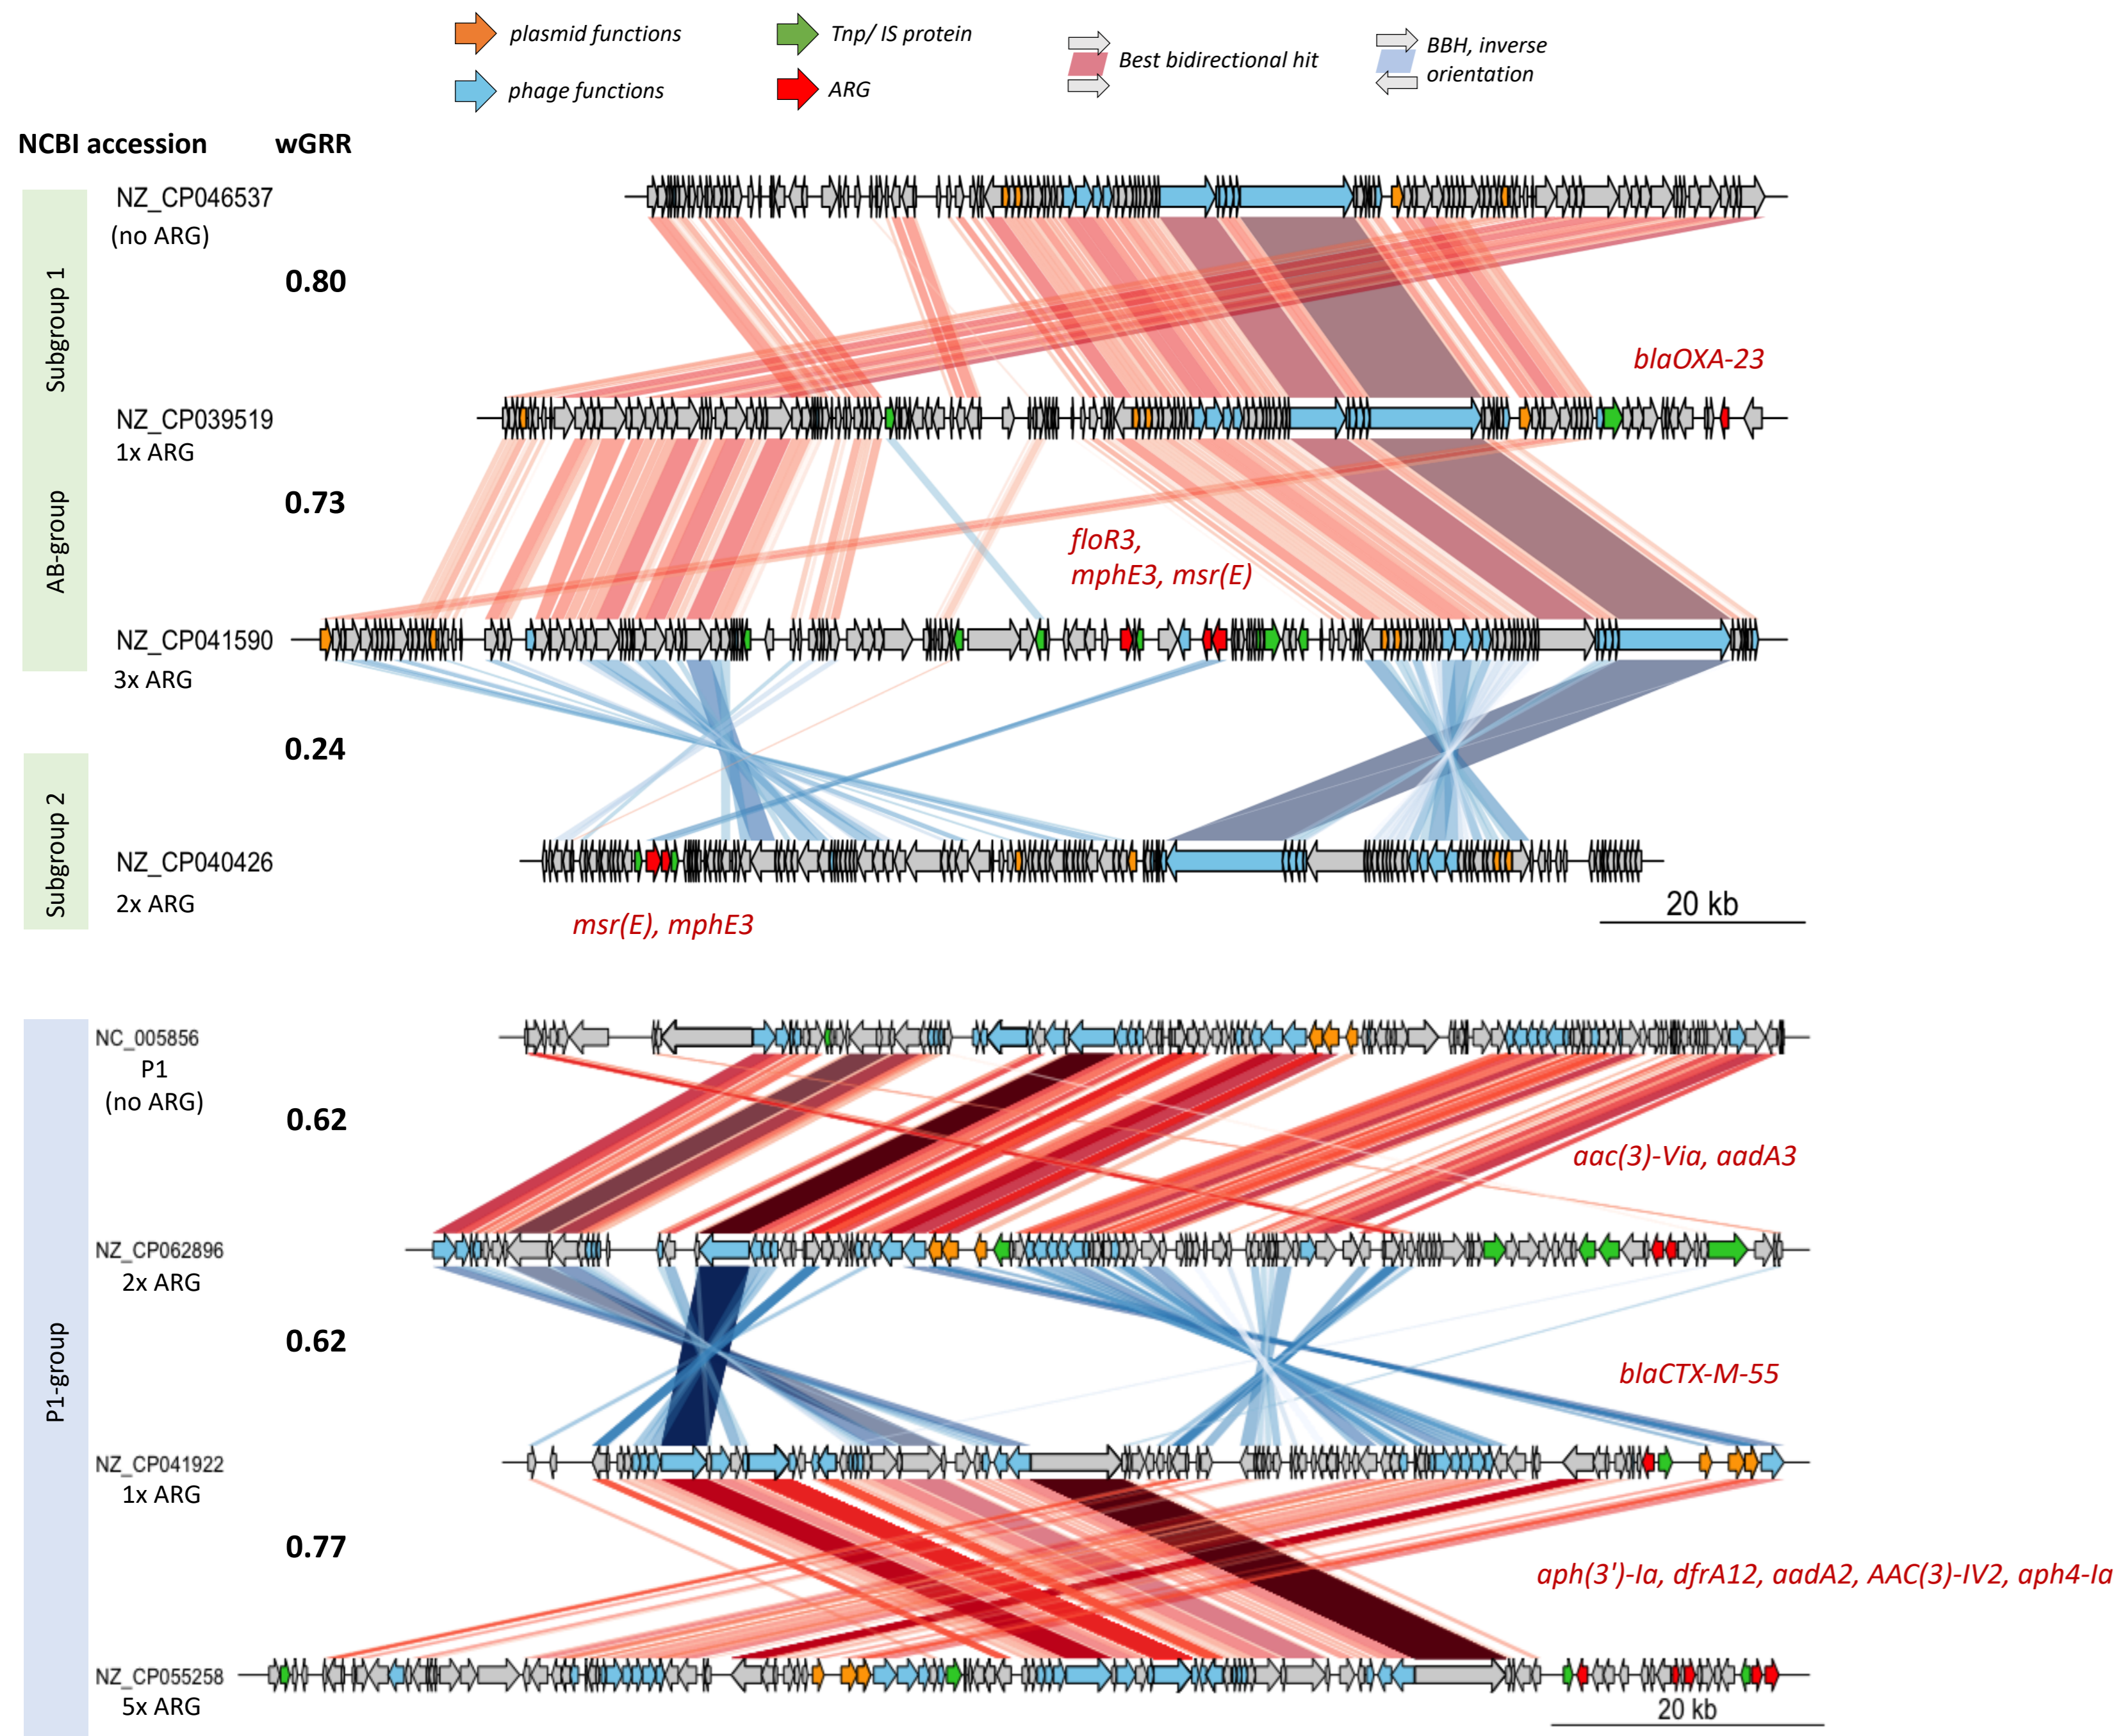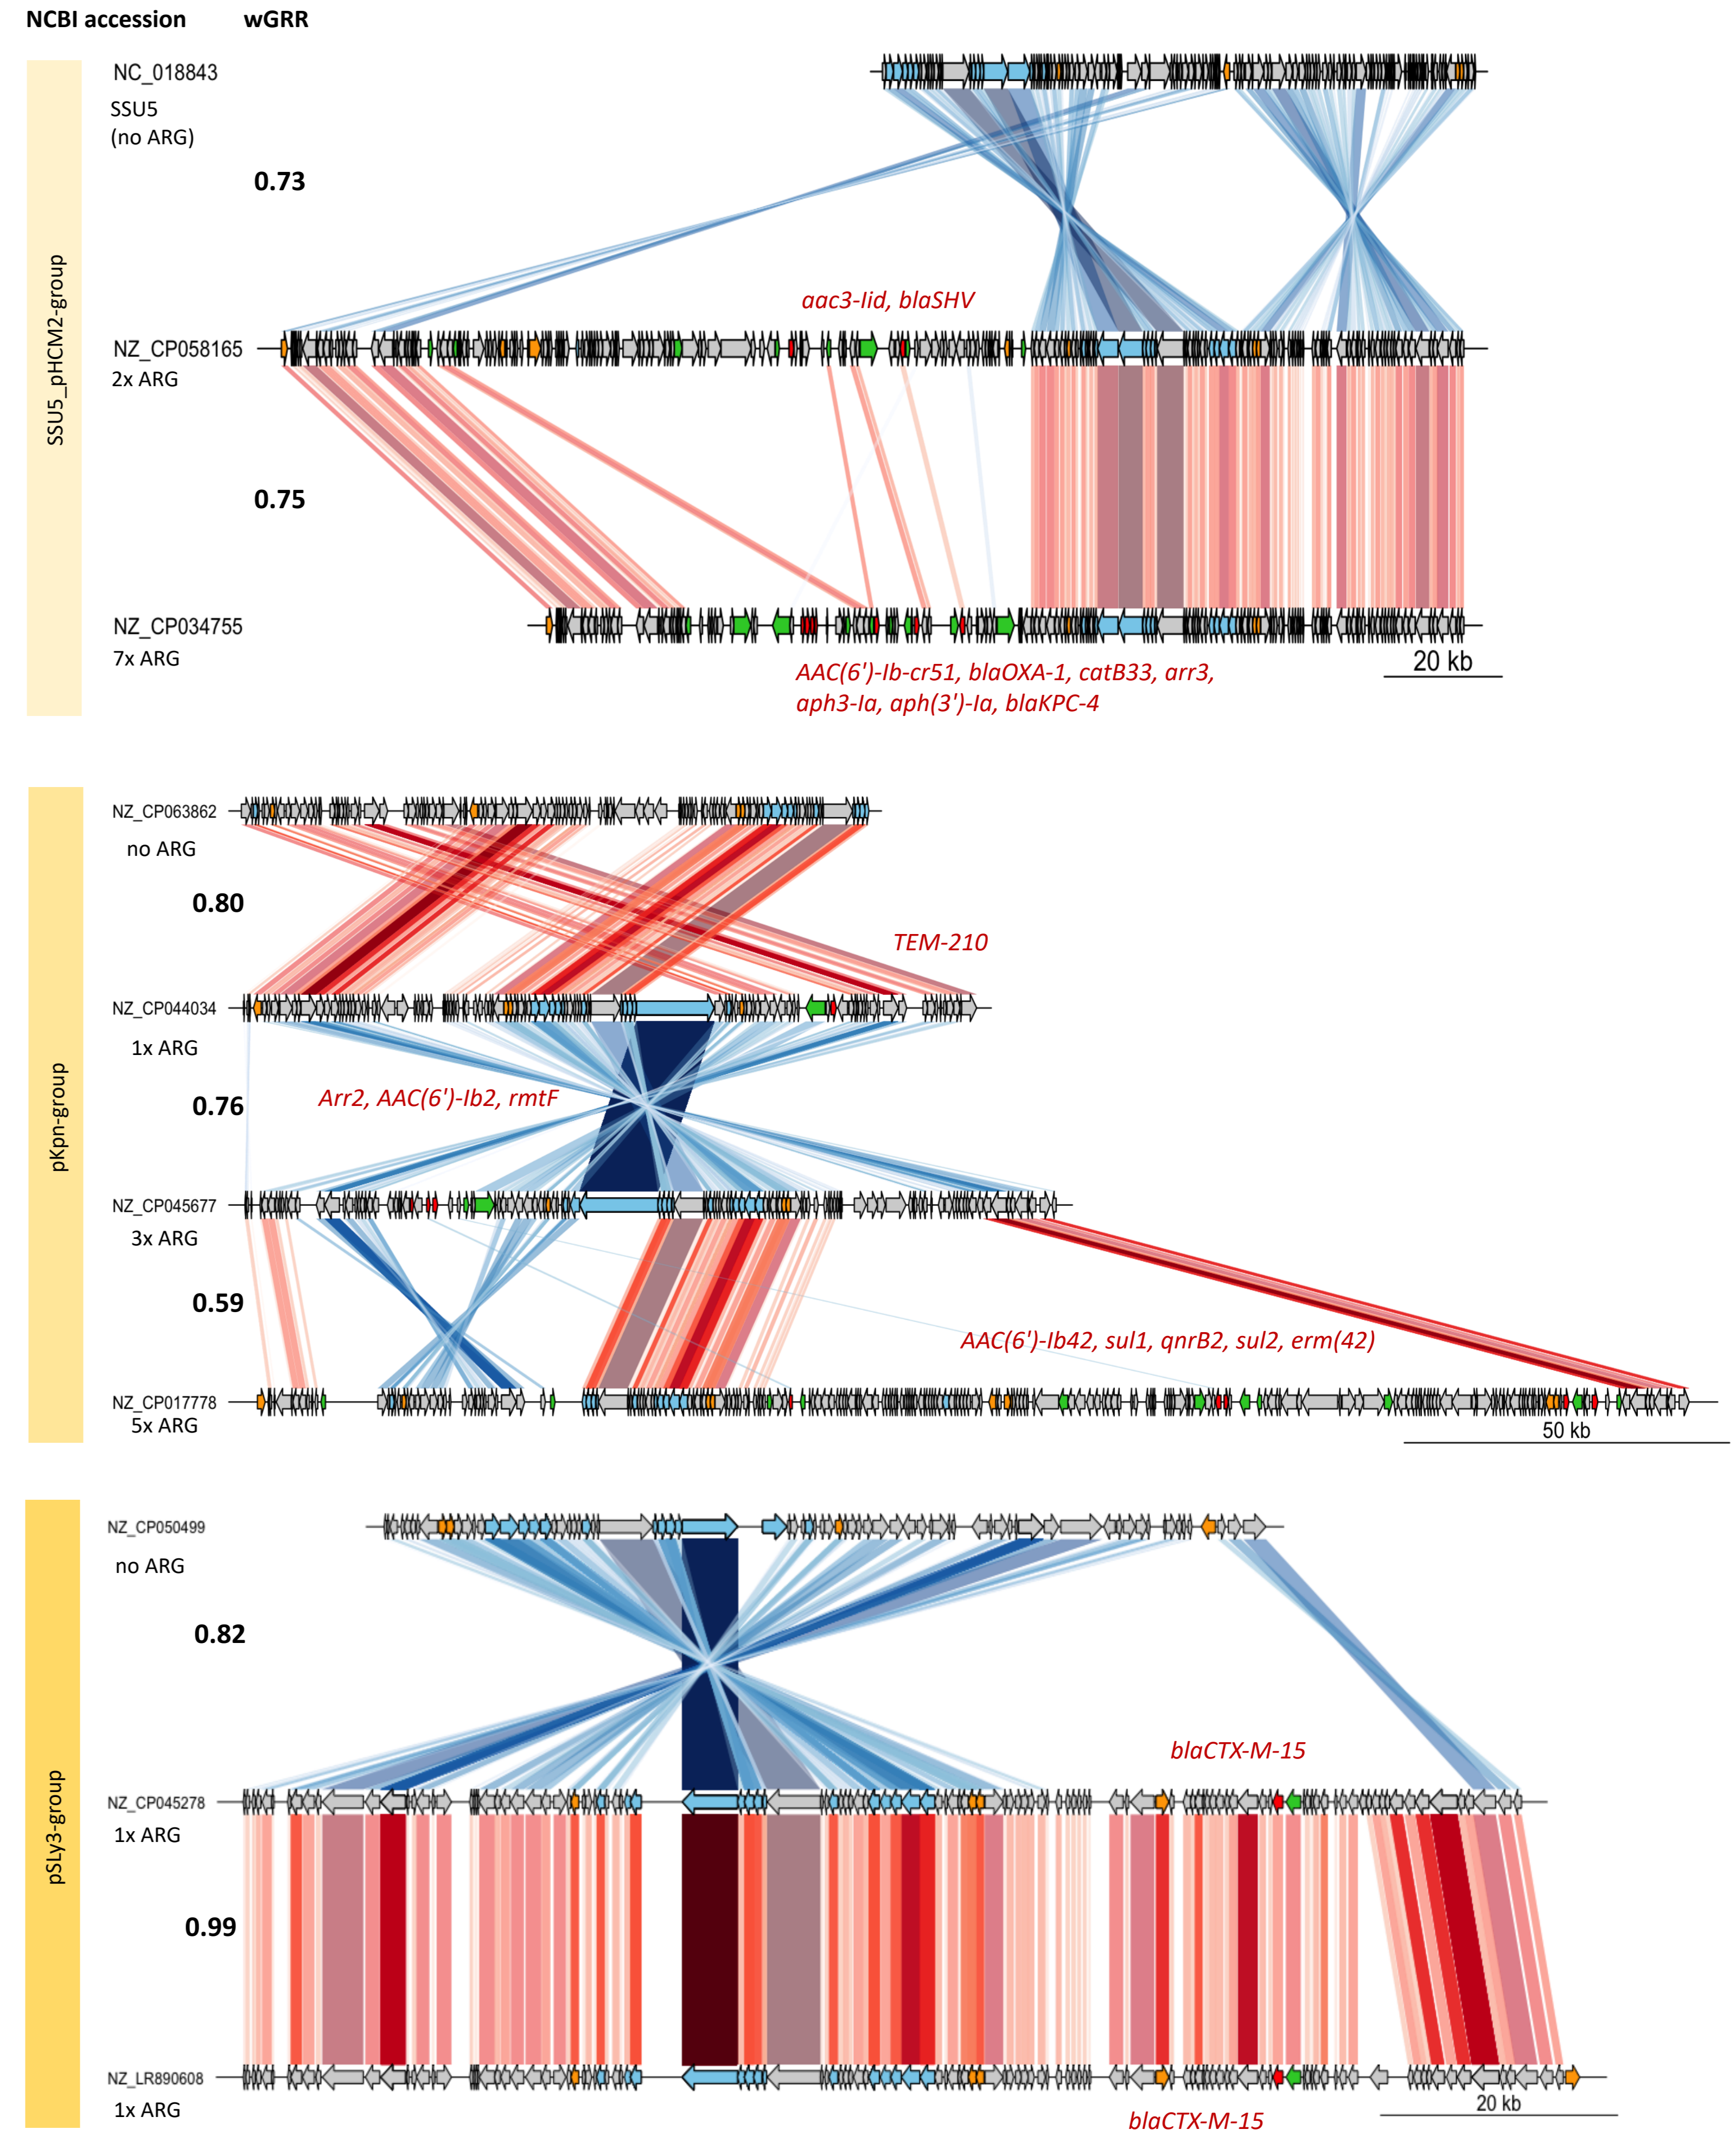

Supplement: mbio.01851-22-s0007.pdf [file mbio.01851-22-s0007.pdf]
