# Supplementary material for: Phage-Plasmids Spread Antibiotic Resistance Genes through Infection and Lysogenic Conversion
Source: PubMed Central journal article supplement (PMC9600943; doi:10.1128/mbio.01851-22), 2022-09-26

A.

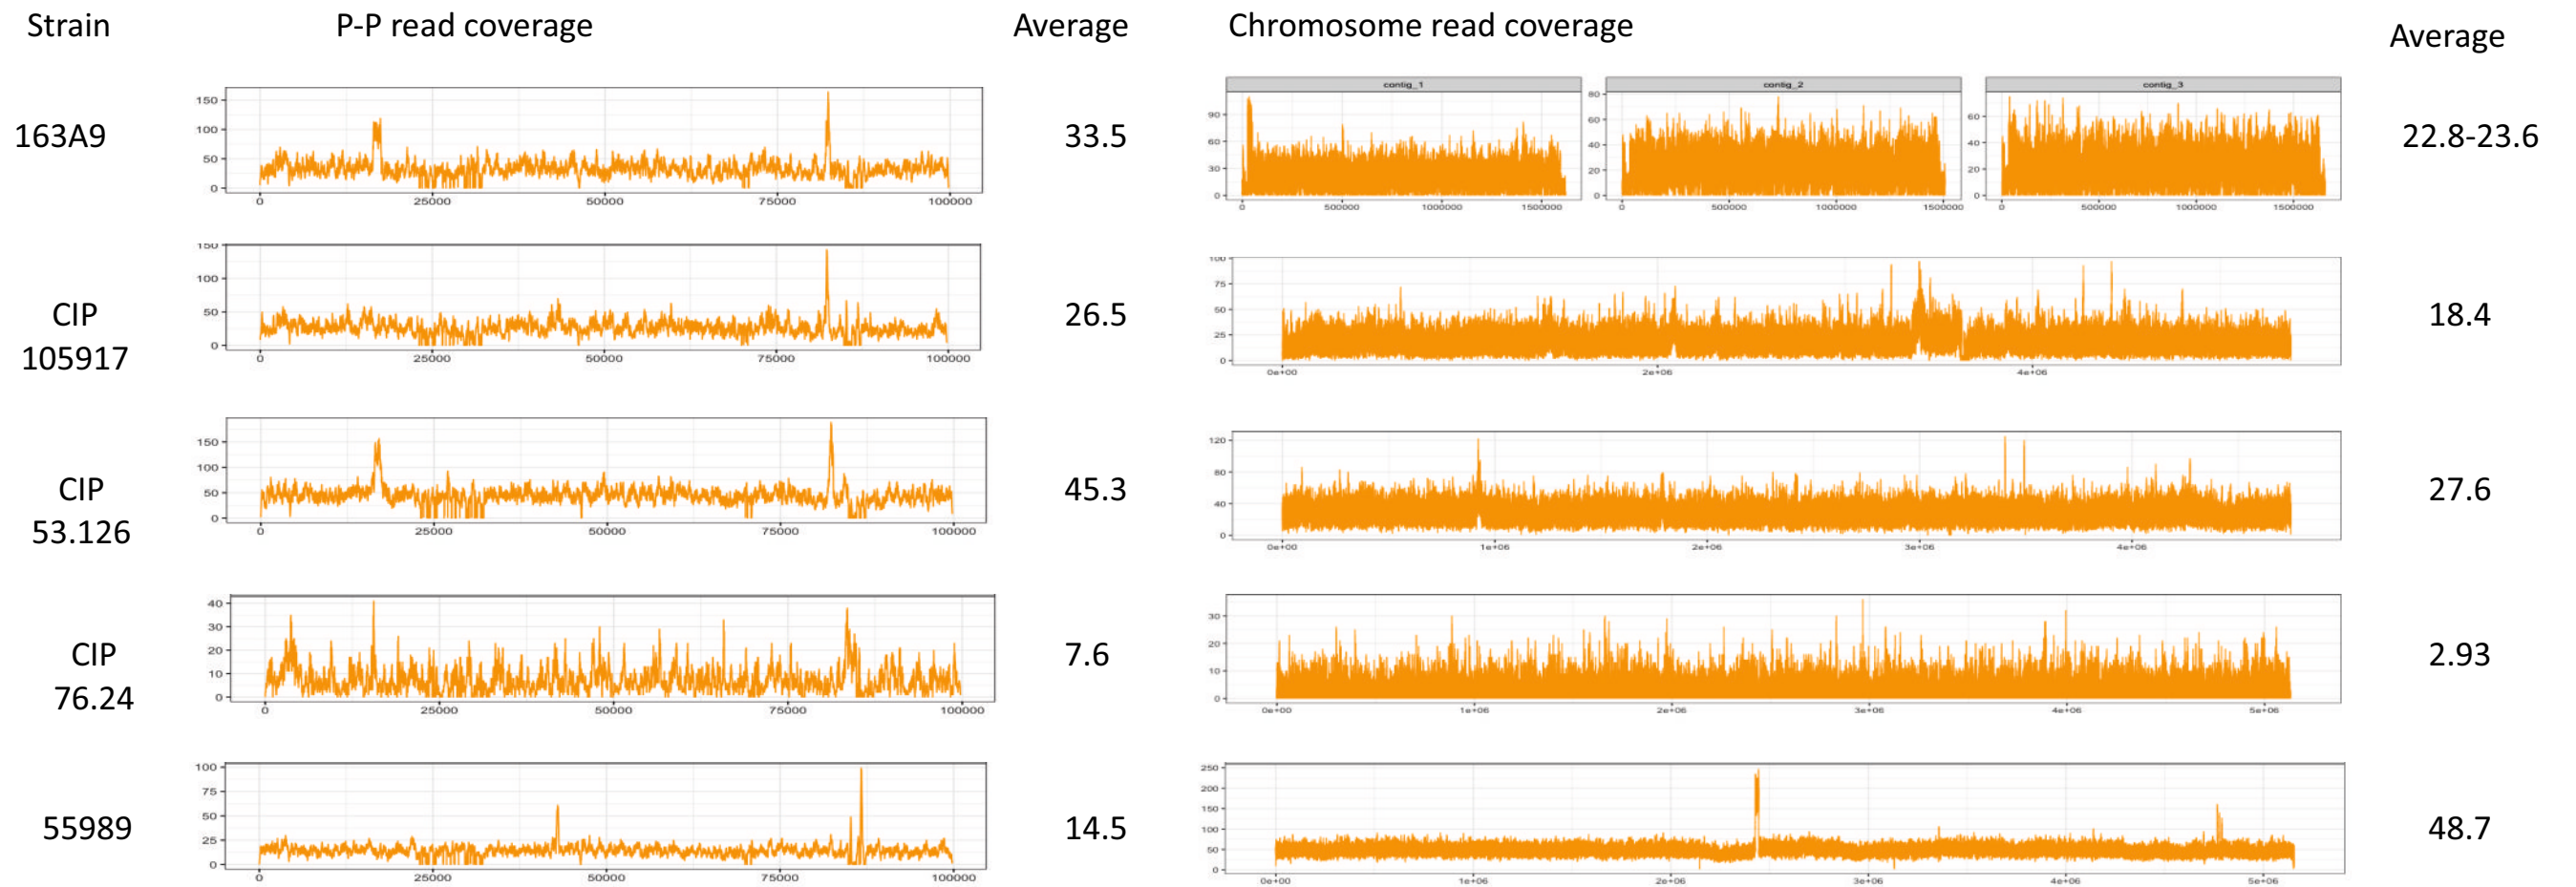

B.

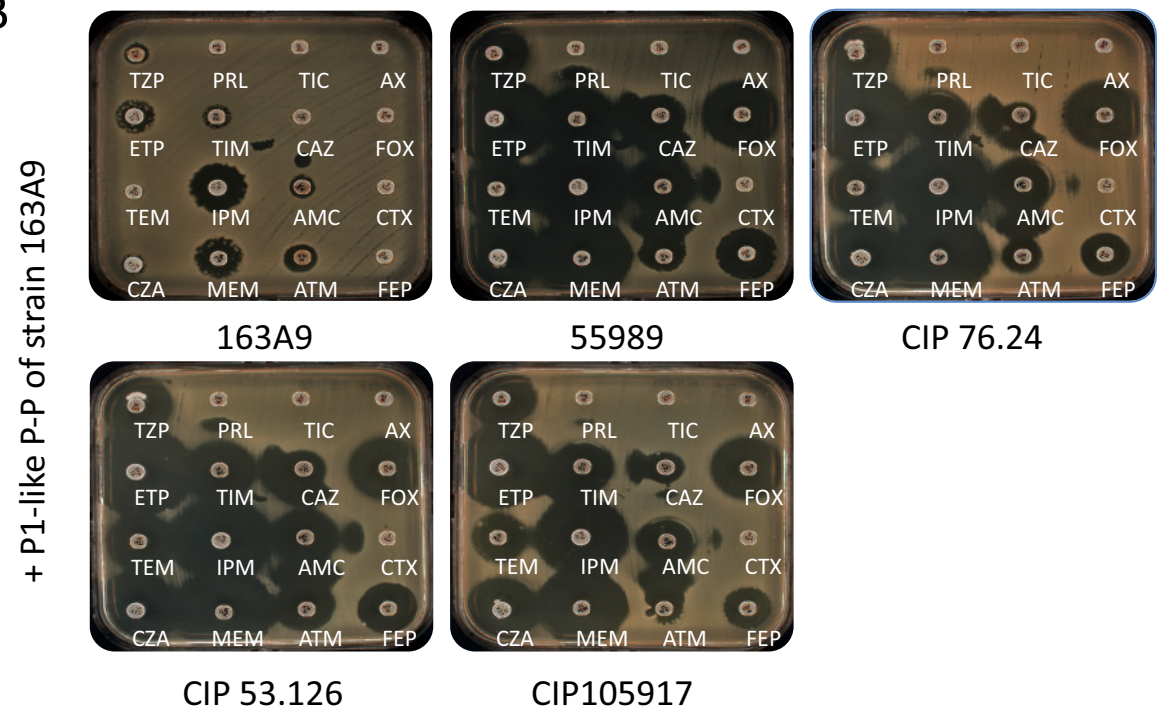

TZP: piperacillin/tazobactam  
 PRL: piperacillin  
 TIC: ticarcillin  
 AX: Amoxicillin  
 ETP: ertapenem

TIM: Ticarcillin/clavulanate  
 CAZ: ceftazidime  
 FOX: cefoxitine  
 TEM: temocillin  
 IPM: imipenem

AMC: Amoxicillin/clavulanate  
 CTX: cefotaxime  
 CZA: ceftazidime/avibactam  
 MEM: meropenem  
 ATM: aztreonam  
 FEP: cefepime

C.

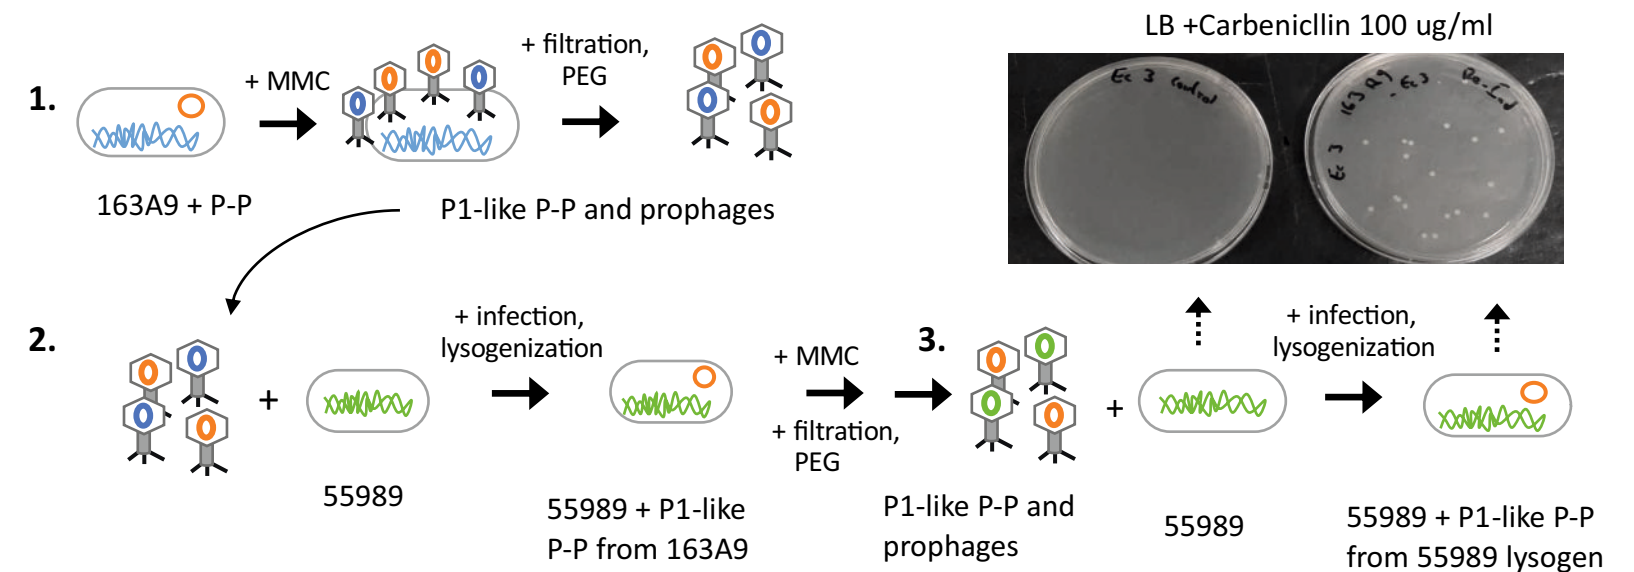

Supplement: mbio.01851-22-s0009.pdf [file mbio.01851-22-s0009.pdf]
